# Supplementary material for: Imaging cytoplasmic lipid droplets in vivo with fluorescent perilipin 2 and perilipin 3 knock-in zebrafish
Source: eLife. 2021 Aug 13;10:e66393. doi: 10.7554/eLife.66393 (PMC8460263; doi:10.7554/eLife.66393)
Supplement: Figure 1—figure supplement 1—source data 1. [file elife-66393-fig1-figsupp1-data1.xlsx]

## Sheet: Sheet1
Figure 1 - figure supplement 1 source data
Supplement 1D
	Time	Sample	Treatment	Gene of Interest (GOI)	Mean Ct (triplicate)		Housekeeping gene	Mean Ct (triplicate)		Delta CT GOI-Control
	0	long 1	unfed	plin2	36.3603		18S	18.592		17.7683
	0	long 2	unfed	plin2	34.6441		18S	18.7772		15.8669
	0	long 3	unfed	plin2	35.2839		18S	18.7714		16.5125
	0	long 4	unfed	plin2	35.7647		18S	19.956		15.8086
	0	long 5	unfed	plin2	35.8085		18S	19.9973		15.8113
	1.5hr	long 1	fed	plin2	27.76		18S	18.7782		8.98181
	1.5hr	long 2	fed	plin2	24.7964		18S	18.6049		6.1915
	1.5hr	long 3	fed	plin2	31.5598		18S	19.7932		11.7666
	1.5hr	long 4	fed	plin2	25.8923		18S	20.1702		5.72212
	1.5hr	long 5	fed	plin2	24.7346		18S	19.3289		5.40575
	0	short 1	unfed	plin2	34.4321		18S	18.8042		15.6279
	0	short 2	unfed	plin2	35.7483		18S	20.2208		15.5274
	0	short 3	unfed	plin2	35.1264		18S	20.1852		14.9412
	0	short 4	unfed	plin2	37.65		18S	21.128		16.5219
	0	short 5	unfed	plin2	36.2769		18S	20.2017		16.0752
	1.5hr	short 1	fed	plin2	30.7576		18S	20.4359		10.3216
	1.5hr	short 2	fed	plin2	31.0516		18S	21.8411		9.2105
	1.5hr	short 3	fed	plin2	31.5627		18S	19.1151		12.4476
	1.5hr	short 4	fed	plin2	28.8238		18S	21.3119		7.5119
	1.5hr	short 5	fed	plin2	27.4562		18S	20.781		6.67522
