# Supplementary material for: Imaging cytoplasmic lipid droplets in vivo with fluorescent perilipin 2 and perilipin 3 knock-in zebrafish
Source: eLife. 2021 Aug 13;10:e66393. doi: 10.7554/eLife.66393 (PMC8460263; doi:10.7554/eLife.66393)
Supplement: Figure 2—source data 1. [file elife-66393-fig2-data1.xlsx]

## Sheet: Figure 2B
Figure 2 source data
Figure 2B
Fus(plin3-RFP)
Fish	Unfed	1h	2h	3h	4h	5h	6h	7h	8h	10h	12h	14h	16h	18h	20h	22h	24h	26h	28h	30h
1	4.46235e+07	4.56947e+07	4.29161e+07	61834250	4.42288e+07	5.36138e+07	50537738	6.63832e+07	6.47802e+07	8.8165e+07	7.4488e+07	8.14561e+07	7.38758e+07	6.22494e+07	6.03552e+07	8.60514e+07	7.24044e+07	8.32267e+07	5.69223e+07	4.83206e+07
2	4.54762e+07	5.06432e+07	3.9965e+07	42514060	5.44008e+07	6.30612e+07	76150248	4.65946e+07	6.80483e+07	4.79023e+07	7.77416e+07	1.08339e+08	5.79454e+07	6.12732e+07	5.98843e+07	1.25135e+08	6.20968e+07	4.21509e+07	6.22188e+07	6.00484e+07
3	4.59537e+07	5.38504e+07	5.31405e+07	55417535	5.59077e+07	5.03905e+07	48471929	6.39009e+07	7.1204e+07	8.78182e+07	6.46326e+07	5.05279e+07	6.23983e+07	5.05084e+07	6.21695e+07	6.18661e+07	6.26868e+07	6.47897e+07	5.51038e+07	6.92085e+07
4	3.88331e+07	5.1184e+07	4.97324e+07	41760124	6.21327e+07	4.65013e+07	48888726	3.09701e+07	5.73646e+07	6.74378e+07	6.88212e+07	7.10228e+07	5.29873e+07	9.36601e+07	4.61076e+07	8.24434e+07	6.70418e+07	4.74253e+07	5.05691e+07	3.47176e+07
5	4.49125e+07	4.92674e+07	5.44048e+07	5.60579e+07	6.44626e+07	52459894	58926461	5.33816e+07	7.72663e+07	5.60455e+07	5.86343e+07	5.07841e+07	7.59425e+07	7.42091e+07	1.00016e+08	5.97127e+07	5.04769e+07	4.74871e+07	5.86102e+07	4.9447e+07
6	3.48345e+07	4.88988e+07	5.94783e+07	7.17044e+07	4.46748e+07	65742540	46488277	5.25094e+07	7.94989e+07	7.50219e+07	6.82007e+07	4.73397e+07	1.04693e+08	4.26712e+07	8.5781e+07	8.96972e+07	7.803e+07	5.36202e+07	6.43624e+07	4.41035e+07
7	3.44944e+07	6.64727e+07	4.67934e+07	4.99561e+07	5.28627e+07	79447392	4.89188e+07	5.61436e+07	5.68716e+07	5.97969e+07	6.85602e+07	4.66453e+07	1.10694e+08	3.92292e+07	1.05947e+08	1.01367e+08	9.54621e+07	6.05869e+07	5.76391e+07	5.91078e+07
8	4.22114e+07	4.95625e+07	5.55053e+07	5.6427e+07	6.63619e+07	63693266	8.95503e+07	7.19264e+07	86818372	77114227	7.02592e+07	6.52608e+07	1.11451e+08	9.44696e+07	5.47126e+07	1.13412e+08	8.83768e+07	6.02855e+07	5.34936e+07	5.98099e+07
9	50387046	5.53766e+07	4.80773e+07	5.49968e+07	5.54374e+07	64061982	7.33725e+07	6.15881e+07	62462192	67696773	7.79988e+07	1.10739e+08	7.52393e+07	7.92908e+07	3.0228e+07	5.6559e+07	9.4093e+07	7.33187e+07	8.40565e+07	7.00228e+07
10	52784318	4.58509e+07	5.02628e+07	6.40121e+07	6.8091e+07	75082609	6.64602e+07	4.6575e+07	79482030	87791839	7.92746e+07	6.19774e+07	6.85973e+07	1.14125e+08	6.23677e+07	1.37328e+08	1.0075e+08	5.2891e+07	6.93517e+07	4.64311e+07
11	51019827	4.79295e+07	4.32526e+07	3.74987e+07	5.01101e+07	63245053	7.01934e+07	6.08802e+07	52349893	76582857	7.13582e+07	1.12516e+08	8.83264e+07	5.28006e+07	6.11114e+07	5.99306e+07	6.3956e+07	9.70649e+07	7.34021e+07	9.90455e+07
12	50644973	5.44937e+07	6.02702e+07	4.6294e+07	5.59546e+07	57828765	5.512e+07	6.1738e+07	80229802	63854549	7.71982e+07	9.14568e+07	1.27104e+08	8.58453e+07	7.70134e+07	8.28427e+07	5.11371e+07	6.32785e+07	4.08734e+07	7.16209e+07
13	46345168	4.98198e+07	4.87844e+07	4.06039e+07	6.68891e+07	51816728	6.4462e+07	6.46408e+07	80787518	64561420	6.89081e+07	7.14158e+07	6.13531e+07	7.57419e+07	8.33175e+07	9.00199e+07	5.63479e+07	8.25906e+07	6.60397e+07	5.40463e+07
14	42051990	5.03785e+07	5.16219e+07	4.04398e+07	5.66233e+07	4.67135e+07	6.86274e+07	6.58877e+07	77992441	90574652	8.15621e+07	6.07722e+07	7.59791e+07	6.48163e+07	5.92622e+07	5.01987e+07	6.85512e+07	8.41428e+07	7.59843e+07	4.77115e+07
15		4.27008e+07				6.09498e+07	5.61509e+07	6.40252e+07	76318312	89358210	82947160	8.89079e+07	7.1562e+07	3.48587e+07		1.06844e+08	7.46243e+07	5.58681e+07	6.73352e+07	8.18442e+07
16		4.03861e+07				5.04839e+07	7.58107e+07	6.4187e+07	63096929	6.40263e+07	72381668	9.47903e+07	9.28656e+07	7.44729e+07		6.31428e+07	6.8074e+07	7.13757e+07	6.31699e+07	6.474e+07
17						5.09274e+07	7.39604e+07	6.65117e+07	84824066	8.44753e+07	55451209	7.07592e+07		6.47539e+07			6.47471e+07		6.88069e+07	5.66357e+07
18						5.54946e+07	7.28002e+07	6.12125e+07	52373882	9.10225e+07	67448351	8.40429e+07							6.37874e+07	4.79469e+07
19						6.33235e+07	7.33642e+07	8.22219e+07	75466207	5.86547e+07	75969102	7.58431e+07							8.09084e+07	7.04564e+07
20							6.06524e+07		70329426	6.66871e+07	47541504	7.76809e+07							6.46586e+07	4.8064e+07
21							6.60587e+07			8.07101e+07	64542082	1.07133e+08							7.26409e+07	5.21402e+07
22										7.9102e+07		7.95217e+07							6.49894e+07	6.3197e+07
23												1.0388e+08
Significance from Unfed	not applicable	ns	ns	ns	ns	ns	*	ns	****	****	****	****	****	**	*	****	****	*	**	ns
p-value	not applicable	>0.9999	>0.9999	>0.9999	>0.9999	0.9141	0.0105	0.1943	<0.0001	<0.0001	<0.0001	<0.0001	<0.0001	0.0032	0.0176	<0.0001	<0.0001	0.0322	0.0041	0.7505
Fus(EGFP-plin2)
Fish	Unfed	1h	2h	3h	4h	5h	6h	7h	8h	10h	12h	14h	16h	18h	20h	22h	24h	26h	28h	30h
1	653527	1919858	-3.82597e+06	66042.8	7.815e+06	2501416	45185831	1.9851e+07	7.03997e+06	6.1256e+07	4.67229e+07	5.58724e+07	3.21284e+06	1669032	405027	2.42355e+07	1.50461e+07	250042	9.90725e+06	2.68498e+06
2	493625	1229182	3.7071e+06	4.69013e+06	6.23116e+06	199868	8451030	1.11173e+07	5.38314e+07	4.29045e+07	1.72425e+07	5.06767e+06	1.37421e+07	6.31218e+06	5.26455e+06	3.6699e+07	1.47872e+06	7.92224e+06	9.4652e+06	-1.23479e+06
3	65614	-2703623	-2.60449e+06	4.42303e+06	-862575	2944840	4587096	1.2401e+07	3.79476e+07	4.25481e+07	2.44293e+07	3.34814e+07	2.62695e+06	1.05049e+07	-2.71269e+06	3.63478e+06	1.93288e+06	951313	2.16926e+06	4.84362e+06
4	1983505	1559976	4.91078e+06	4.69358e+06	-219922	16305273	27179882	4.00513e+07	1.09182e+07	1.41186e+07	1.96117e+07	1.9297e+06	8.83141e+06	5.77145e+06	8.47603e+06	1.82435e+06	4.8324e+06	1.96498e+06	2356830	1.48837e+06
5	1205007	396842	5.40345e+06	3.14349e+06	-4.43512e+06	23380899	2722918	1.09556e+07	1.12264e+07	5.29145e+07	7.02148e+06	1.15057e+06	3.86375e+06	8.18111e+06	6.35472e+06	-630293	1.27195e+06	204120	-488523	2.2682e+06
6	-798321	-629092	1.62306e+06	2.59467e+06	9.86927e+06	10365484	5.33048e+07	1.95189e+07	2.18404e+07	4.17361e+07	9.19462e+06	7.90603e+06	-2.65738e+06	2.89631e+06	4.30017e+06	-614398	8.91737e+06	855688	5.77298e+06	1.56023e+06
7	-1192104	1395986	3.21151e+06	8.673e+06	7.1317e+06	7848888	6.90445e+06	1.49621e+07	5.55144e+07	7.35777e+06	5.78707e+06	8.87459e+06	3.9246e+06	1441314	2.46957e+06	-2.09704e+06	3.53191e+06	3.8527e+06	3.24843e+06	1.01051e+06
8	2.85077e+06	1.61867e+06	-384026	7.87463e+06	9.42216e+06	2668793	2.20831e+07	-932601	3.04421e+07	5.8167e+07	29595989	5.39173e+07	3.49239e+06	2.43551e+07	3.43797e+07	2.13879e+07	2.50195e+07	6.48107e+06	1.39671e+07	5.37792e+06
9	-874807	-219344	1.64593e+06	-2.42242e+06	3.99494e+06	-3140135	2.43398e+07	2.95848e+07	9.49497e+06	5.22369e+07	15256127	1.64995e+07	1.10615e+07	1.26693e+07	1.07094e+07	2.33449e+07	1.2942e+07	4.92609e+06	3.87014e+06	914462
10	2.24403e+06	2.34434e+06	-362773	1.29315e+06	796942	1.8554e+07	2.52549e+07	7.96337e+06	8.05568e+06	1.57151e+07	49680318	1.78761e+06	3.85713e+07	1.64911e+07	1.33572e+07	1.3887e+07	1.40211e+07	9.78967e+06	614604	1.71163e+06
11	1.83192e+06	-2.92548e+06	6.91298e+06	4.61187e+06	1.41315e+07	2.03451e+07	4.90924e+06	3.98486e+07	3.19829e+07	2.93059e+07	27919956	5.14594e+07	2.69912e+07	1.80545e+06	1.79814e+06	3.50308e+07	1.34538e+07	6.06483e+06	3.00686e+06	2.67866e+06
12	-553773	-980722	3.76307e+06	3.61354e+06	2.06231e+06	7.97142e+06	4.09579e+07	8.61921e+06	4.36166e+07	3.4505e+07	6833397	2.37485e+07	2.42413e+07	1.69397e+07	3.47294e+06	2.63949e+07	1.22964e+06	2.2047e+07	5.3926e+06	-1.14374e+06
13	-4.57832e+06	-614462	-415696	2.44385e+06	1.07002e+07	1.04557e+07	2.76888e+07	6.46185e+06	1.49362e+07	5.59106e+07	18620731	3.88249e+07	1.44972e+07	5.13401e+06	-956772	3.50853e+07	1.201e+07	1.4167e+07	1.66509e+07	654074
14	497752	-630134	3.16462e+06	1.13341e+06	9.40625e+06	7.82546e+06	1.26865e+07	7.88682e+06	2.27272e+07	16206905	4.342e+07	6.35863e+06	2.49629e+07	3.1177e+07	6.15425e+06	2.28862e+07	-63786.2	438986	1.43597e+07	5.06295e+06
15	-1.43064e+06	3.75633e+06	2.27293e+06	1.65281e+06		2299023	2.4306e+07	1.96223e+07	1.38575e+07	21737372	2.40473e+07	2.21577e+07	3.3954e+07	1.09764e+07	3.89775e+06	1.77959e+07	2.82191e+06	1.11369e+06	1.70756e+06	4.08183e+06
16	-2.94022e+06	7.23993e+06	5.73595e+06	1.8106e+06		6466747		1.51242e+07	2.44318e+07	51512384	5.24146e+07	1.28279e+07	1.18507e+07	1.02901e+06	1.85571e+06	2109402	1.52621e+07	954415	4.77815e+06	2.07257e+06
17	-2.11736e+06	3.62116e+06		725660		11671994		9.3043e+06		14422649	2.575e+07	2.5039e+06	9.52677e+06	1.62015e+07	1.26294e+07	7.82911e+06	3.57184e+06	-10098	-452804	3.85826e+06
18	2.19309e+06	-3.06994e+06						5.2016e+07		16689613	1.25051e+07	3.1676e+07	2.92625e+07		1.6659e+07	-1.45727e+06	3.97229e+06		1.54732e+06	9053856
19	-1.40715e+06	3.02945e+06						2.34693e+07		10042587	1.82451e+07	1.50106e+07	2.39089e+07			8.17977e+06	1.41981e+06		4.71642e+06	2.12223e+06
20								6.50078e+06		21772926	3.40218e+07	9.09443e+06				7.53579e+06	1.84512e+07			2592864
21								3.23306e+07								5.60143e+06
Significance from Unfed	not applicable	ns	ns	ns	ns	*	****	****	****	****	****	****	****	**	ns	***	*	ns	ns	ns
p-value	not applicable	>0.9999	>0.9999	>0.9999	>0.9999	0.0242	<0.0001	<0.0001	<0.0001	<0.0001	<0.0001	<0.0001	<0.0001	0.0063	0.2898	0.001	0.0494	>0.9999	0.8415	>0.9999

## Sheet: Figure 2D
Figure 2 source data
Figure 2D
Fish #	Mean gray value	EGFP-Plin2
	low = more opaque	fluorescence
1	938.364	6.1256e+07
2	979.129	4.29045e+07
3	1077.87	4.25481e+07
4	1080.05	1.41186e+07
5	873.349	5.29145e+07
6	988.489	4.17361e+07
7	1225.3	7.35777e+06
8	824.808	5.8167e+07
9	915.058	5.22369e+07
10	1021.22	1.57151e+07
11	959.548	2.93059e+07
12	980.249	3.4505e+07
13	622.801	5.59106e+07
14	1284.5	16206905
15	1118.11	21737372
16	877.834	51512384
17	1160.02	14422649
18	1185.51	16689613
19	1186.35	10042587
20	1016.76	21772926
