# Supplementary material for: Imaging cytoplasmic lipid droplets in vivo with fluorescent perilipin 2 and perilipin 3 knock-in zebrafish
Source: eLife. 2021 Aug 13;10:e66393. doi: 10.7554/eLife.66393 (PMC8460263; doi:10.7554/eLife.66393)
Supplement: Figure 3—source data 1. [file elife-66393-fig3-data1.xlsx]

## Sheet: Sheet1
Figure 3 source data
Figure 3C
	Fish #	tM1	tM2
0h	1	0.0703	0.0102
	2	0.0493	0.0002
	3	0.0736	0.0227
	4	0.0774	0
1.5h	1	0.0756	0.0258
	2	0.0837	0.015
	3	0.0616	0.0021
	4	0.0696	0.0009
2.5h	1	0.1721	0.0817
	2	0.096	0.049
	3	0.1342	0.1203
	4	0.1348	0.1209
3.5h	1	0.1732	0.4042
	2	0.2247	0.2197
	3	0.1749	0.116
	4	0.2244	0.212
6.5h	1	0.2484	0.4773
	2	0.2175	0.4495
	3	0.1879	0.224
	4	0.2825	0.4901
