# Supplementary material for: Imaging cytoplasmic lipid droplets in vivo with fluorescent perilipin 2 and perilipin 3 knock-in zebrafish
Source: eLife. 2021 Aug 13;10:e66393. doi: 10.7554/eLife.66393 (PMC8460263; doi:10.7554/eLife.66393)
Supplement: Figure 4—figure supplement 1—source data 1. [file elife-66393-fig4-figsupp1-data1.xlsx]

## Sheet: Sheet1
Figure 4 - figure supplement 1 source data
Supplement 1D & 1E
	Fish #	Male/Female	Standard Length	Mass	BMI (g/cm2)	Genotype		Fish #	Male/Female	Standard Length	Mass	BMI (g/cm2)	Genotype
	1	F	2.4	0.22	0.0381944	WT		1	M	2.2	0.165	0.0340909	EGFP
	2	M	2	0.168	0.042	WT		2	M	2.4	0.251	0.0435764	EGFP
	3	M	2.5	0.24	0.0384	WT		3	F	2.5	0.311	0.04976	EGFP
	4	F	2.5	0.274	0.04384	WT		4	F	2.6	0.305	0.0451183	EGFP
	5	M	2.3	0.209	0.0395085	WT		5	M	2.4	0.252	0.04375	EGFP
	6	F	2.4	0.298	0.0517361	WT		6	M	2.4	0.229	0.0397569	EGFP
	7	M	2.4	0.22	0.0381944	WT		7	M	2.5	0.255	0.0408	EGFP
	8	F	2.4	0.278	0.0482639	WT		8	M	2.4	0.258	0.0447917	EGFP
	9	F	2	0.161	0.04025	WT		9	M	2.6	0.273	0.0403846	EGFP
	10	M	2.5	0.276	0.04416	WT		10	M	2.3	0.207	0.0391304	EGFP
	11	F	2.3	0.256	0.0483932	WT		11	F	2.7	0.351	0.0481481	EGFP
	12	M	2.4	0.218	0.0378472	WT		12	M	2.4	0.208	0.0361111	EGFP
	13	M	2.3	0.225	0.0425331	WT		13	M	2.6	0.253	0.037426	EGFP
	14	F	2.7	0.36	0.0493827	WT		14	M	2.5	0.25	0.04	EGFP
	15	M	2.3	0.19	0.0359168	WT		15	M	2.5	0.27	0.0432	EGFP
	16	M	2.4	0.233	0.0404514	WT		16	F	2.8	0.377	0.0480867	EGFP
	17	F	2.6	0.256	0.0378698	WT		17	F	2.5	0.305	0.0488	EGFP
	18	F	2.4	0.317	0.0550347	WT		18	F	2.6	0.337	0.0498521	EGFP
	19	F	2.5	0.315	0.0504	WT		19	M	2.2	0.156	0.0322314	EGFP
	20	F	2.5	0.305	0.0488	WT		20	M	2.5	0.241	0.03856	EGFP
	21	F	2.4	0.26	0.0451389	WT		21	M	2.5	0.249	0.03984	EGFP
	22	F	2.6	0.313	0.0463018	WT		22	M	2.3	0.187	0.0353497	EGFP
	23	F	2.4	0.268	0.0465278	WT		23	M	2.4	0.228	0.0395833	EGFP
	24	F	2.5	0.322	0.05152	WT		24	M	2.5	0.24	0.0384	EGFP
	25	F	2.5	0.265	0.0424	WT		25	M	2.6	0.282	0.041716	EGFP
	26	F	2.4	0.277	0.0480903	WT		26	F	2.7	0.349	0.0478738	EGFP
	27	F	2.5	0.314	0.05024	WT		27	F	2.3	0.249	0.0470699	EGFP
	28	M	2.4	0.197	0.0342014	WT		28	F	2.5	0.326	0.05216	EGFP
	29	F	2.3	0.244	0.0461248	WT		29	F	2.2	0.206	0.042562	EGFP
	30	M	2.5	0.256	0.04096	WT		30	M	2	0.156	0.039	EGFP
	31	M	2.7	0.292	0.0400549	WT		31	F	2.5	0.307	0.04912	EGFP
	32	F	2.5	0.31	0.0496	WT		32	M	2.7	0.303	0.0415638	EGFP
	33	M	2.6	0.267	0.039497	WT		33	M	2.4	0.216	0.0375	EGFP
	34	F	2.8	0.408	0.0520408	WT		34	F	2.4	0.248	0.0430556	EGFP
	35	M	2.5	0.254	0.04064	WT		35	M	2.3	0.183	0.0345936	EGFP
	36	M	2.5	0.262	0.04192	WT		36	M	2.5	0.268	0.04288	EGFP
	37	M	2.4	0.187	0.0324653	WT		37	M	2.3	0.188	0.0355388	EGFP
	38	F	2.4	0.254	0.0440972	WT		38	F	2.4	0.294	0.0510417	EGFP
	39	M	2.5	0.231	0.03696	WT		39	M	2.3	0.189	0.0357278	EGFP
	40	F	2.3	0.265	0.0500945	WT		40	F	2.7	0.362	0.0496571	EGFP
	41	M	2.4	0.248	0.0430556	WT		41	M	2.3	0.203	0.0383743	EGFP
	42	F	2.4	0.257	0.0446181	WT		42	M	2.4	0.235	0.0407986	EGFP
								43	M	2.4	0.211	0.0366319	EGFP
		Mean	2.43571	0.26119	0.0437343			44	F	2.5	0.288	0.04608	EGFP
	N = 42	SD	0.149506	0.0493036	0.0054941			45	F	2.5	0.278	0.04448	EGFP
	24 female							46	F	2.4	0.228	0.0395833	EGFP
	18 male							47	M	2.4	0.213	0.0369792	EGFP
								48	M	2.6	0.252	0.0372781	EGFP
								49	M	2.5	0.294	0.04704	EGFP
									Mean	2.45102	0.254816	0.0419399
								N = 49	SD	0.152919	0.0539563	0.00510072
								17 female
								32 male
