# Supplementary material for: Imaging cytoplasmic lipid droplets in vivo with fluorescent perilipin 2 and perilipin 3 knock-in zebrafish
Source: eLife. 2021 Aug 13;10:e66393. doi: 10.7554/eLife.66393 (PMC8460263; doi:10.7554/eLife.66393)
Supplement: Figure 4—figure supplement 2—source data 1. [file elife-66393-fig4-figsupp2-data1.xlsx]

## Sheet: Sheet1
Figure 4 - figure supplement 2 source data
LD area as a % of total area
Fish #	WT	Fus(plin3-RFP)/+	Fus(EGFP-plin2)/+	Tg(fabp2: EGFP-PLIN2)/+
1	5.79292	0	2.14499	7.88253
2	8.42891	9.78874	22.064	0
3	7.62073	0.547446	4.28822	3.10722
4	3.46687	3.87801	0.322103	5.74954
5	5.04644	6.02197	2.94675	12.9336
6	10.6756	2.13664	5.6441	9.65299
7	2.98523	8.47291	15.17	6.77744
8	5.50201	8.78712	3.39214	9.13802
9	7.86136	3.13015	8.23506	8.03488
10	0.116697	11.9009	0.0956993
11	3.81957	7.47838	14.5193
12	0.0142804	0.788698	4.78818
13	0.0049518		0.875305
14	5.10875		10.9002
15	9.21658		5.93668
16	0.905476		3.38782
17	3.10028		4.64873
18	0.379128
19	0.502016
20	0.141052
21	0.134254
22	6.4502
23	5.35276
