# Supplementary material for: Imaging cytoplasmic lipid droplets in vivo with fluorescent perilipin 2 and perilipin 3 knock-in zebrafish
Source: eLife. 2021 Aug 13;10:e66393. doi: 10.7554/eLife.66393 (PMC8460263; doi:10.7554/eLife.66393)
Supplement: Figure 4—source data 1. [file elife-66393-fig4-data1.xlsx]

## Sheet: Figure 4C
Figure 4 source data
Figure 4C
	Plin3-RFP on lipid droplets
Fish	0 h	0.75 h	1.25 h	1.5 h	2 h	2.5 h	3 h	3.5 h	4.5 h	5.5 h	6.5 h	7.5 h	8.5 h	16 h	18 h	20 h	22 h	24 h	26 h	28 h	30 h
1	0	340	453	381	338	279	296	322	356	281	453	410	280	161	150	126	148	117	215	142	145
2	0	320	339	332	668	639	539	660	553	311	278	369	274	141	142	124	219	141	202	142	261
3	0	315	507	400	289	264	433	374	315	430	170	277	282	155	157	134	149	97	189	183	188
4	0	188	347	268	449	438	344	326	621	310	161	163	429	144	128	184	194	91	152	123	183
5	0	373	299	293	267	323	279	491	197	424	196	198	178	111	192	97	187	184	152	106	203
6	0	278	492	270	223	510	213	201	179	247	213	196	165	123	133	191	132	212	122	165	188
7	0	327	258	527	258	270	349	241	350	160	380	167	192	173	149	157	157	161	156	171	59
8	0	457	483	195	214	265	270	246	359	157	202	210	241	96	175	157	173	137	187	175	144
9	0	305	368	398	281	194	282	226	325	161	222	164	195	138	183	143	144	183	166	155	142
10	0	310	222	238	337	335	382	246	148	215		161	194	155	149	158	178	158	126	137	146
11	0	335	267	284		225	239	184	272	209					145	156	204	153	56	146	206
12						280	222								129	155	172	117	129	137	138
	Plin3-RFP in cytoplasm
Fish	0 h	0.75 h	1.25 h	1.5 h	2 h	2.5 h	3 h	3.5 h	4.5 h	5.5 h	6.5 h	7.5 h	8.5 h	16 h	18 h	20 h	22 h	24 h	26 h	28 h	30 h
1	60	138	190	157	129	100	110	112	139	133	159	165	151	145	133	119	141	115	202	140	145
2	157	115	134	134	187	179	165	185	178	122	129	165	156	131	121	112	193	122	175	131	227
3	115	122	122	145	114	101	141	108	123	133	112	128	137	122	153	128	143	96	158	162	186
4	94	143	115	105	172	144	134	123	161	131	104	119	158	143	122	171	191	91	141	122	175
5	143	140	129	122	97	131	89	146	110	175	104	134	123	99	181	94	164	171	150	106	187
6	173	130	207	109	99	175	90	88	87	137	134	119	123	123	122	164	131	197	122	153	183
7	140	121	101	214	97	101	126	106	167	98	142	121	125	147	143	120	153	148	141	167	54
8	146	143	182	86	97	100	103	105	139	99	123	123	142	83	135	136	148	112	163	168	128
9	153	118	143	137	109	73	104	106	124	101	127	121	134	109	152	110	136	167	147	153	137
10	157	144	97	96	126	129	126	121	91	132		124	131	119	114	137	135	144	121	113	124
11	170	139	92	110		85	93	88	126	110				126	124	142	182	136	56	119	188
12						105	89							138	129	147	170	117	123	137	136

## Sheet: Figure 4D
Figure 4 source data
Figure 4D
	EGFP-Plin2 on lipid droplets
Fish	0 h	0.75 h	1.25 h	1.5 h	2 h	2.5 h	3 h	3.5 h	4.5 h	5.5 h	6.5 h	7.5 h	8.5 h	16 h	18 h	20 h	22 h	24 h	26 h	28 h	30 h
1	0	35	43	52	49	50	59	234	175	211	391	520	257	1249	949	254	109	125	52	137	138
2	0	38	47	38	60	65	41	165	105	269	203	202	117	625	525	627	107	246	308	90	433
3	0	40	46	45	79	44	51	67	249	196	226	520	500	268	537	675	444	506	491	282	150
4	0	36	43	52	42	54	130	76	238	134	196	393	204	697	871	292	402	410	292	186	64
5	0	39		58	42	54	47	81	67	147	323	271	78	825	453	268	401	313	194	273	239
6	0	40		51	64	75	62	81	108	257	562	498	740	784	696	413	243	248	204	126	276
7	0	40		51	60	66	43	236	195	144	77	545	351	412	510	521	195	120	48	434	464
8	0	39		55	54	59	56	71	286	54	391	250	677	675	455	427	562	373	61	307	107
9	0	39		59	50		133	146	111	292	389	108	299	501	424	512	747	221	77	302	303
10	0	45		44	52		92		335	357		158	448	514	384	827	567	251	99	338	42
11		41		48			78			93		749	462	550	169	637	155	304	193		430
12		40								321			186	409		637	384		151		109
13										207			341			1003	557		196		118
14													383						345		259
15													432						197		287
16													272								110
17													455								266
18													448
	EGFP-Plin2 in cytoplasm
Fish	0 h	0.75 h	1.25 h	1.5 h	2 h	2.5 h	3 h	3.5 h	4.5 h	5.5 h	6.5 h	7.5 h	8.5 h	16 h	18 h	20 h	22 h	24 h	26 h	28 h	30 h
1	34	40	42	42	40	45	48	64	65	91	108	115	89	286	267	96	77	57	35	69	75
2	35	43	36	47	42	42	38	66	53	89	57	49	59	213	149	185	76	109	86	48	118
3	36	36	40	40	50	43	44	44	83	68	64	106	148	69	187	175	123	129	129	110	90
4	36	36	45	36	46	42	60	46	74	52	56	117	67	207	248	101	139	152	101	82	45
5	37	34		43	46	49	40	49	44	61	60	78	48	277	151	114	125	121	105	125	95
6	37	40		41	48	54	44	46	55	63	103	121	112	145	234	168	92	85	103	60	108
7	35	37		39	43	43	40	65	58	53	43	125	82	187	146	143	112	46	45	120	137
8	36	38		38	40	46	42	45	72	39	92	71	121	194	142	106	144	77	41	88	57
9	33	35		44	44		49	48	53	75	99	51	78	105	121	138	130	89	47	93	97
10	37	35		42	40		47		106	71		51	114	162	115	209	114	88	51	80	40
11		35		42			47			44		176	96	192	79	137	66	97	65		113
12		45								79			59	111		179	110		53		45
13										65			79			208	148		74		40
14													85						101		91
15													113						74		86
16													65								53
17													121								114
18

## Sheet: Figure 4E
Figure 4 source data
Figure 4E
	fabp2:EGFP-PLIN2 on lipid droplets
Fish	0 h	0.75 h	1.25 h	1.5 h	2 h	2.5 h	3 h	3.5 h	4.5 h	5.5 h	6.5 h	7.5 h	8.5 h	16 h	18 h	20 h	22 h	24 h	26 h	28 h	30 h
1	0	101	92	120	167	141	200	188	383	309	207	588	736	334	557	739	476	465	400	90	394
2	0	76	66	180	132	205	232	140	216	265	304	471	1150	456	545	546	542	471	468	188	0
3	0	88	117	115	114	176	243	200	253	304	317	313	321	668	244	490	161	289	823	602	505
4	0	98		109	149	122	163	121	170	189	341	353	379	359	335	227	698	589	472	544	526
5	0	140		199	106	117	130	233	301	227		669	351	417	682	355	722	276	289	331	188
6	0	40		137	224	154	350	207	336	217		338		929	487	191	790	0	454	393	254
7	0	74		143	248	118	94	47	272	200		565		581	298	338	198	467	672	112	437
8	0	43		136	199	189		273	281	136				319	557	666	387	151	667	57	304
9	0			172		220		293	182	179				370	496	721	680	225	159	90	378
10	0							263	210	259				474	334	173	338	146	98	261
11	0							236	465					436	713	311	123	451	543
12	0							321	209					263	260	235	658	364	234
13	0							218	273						427	568	121	366	153
14	0							268											53
15	0							254											191
16																			98
	fabp2:EGFP-PLIN2 in cytoplasm
Fish	0 h	0.75 h	1.25 h	1.5 h	2 h	2.5 h	3 h	3.5 h	4.5 h	5.5 h	6.5 h	7.5 h	8.5 h	16 h	18 h	20 h	22 h	24 h	26 h	28 h	30 h
1	57	48	55	74	66	60	64	61	96	79	84	129	176	92	166	130	117	89	101	101	76
2	59	45	61	64	63	45	78	70	73	99	96	95	173	81	101	107	101	92	101	55	44
3	50	45	80	56	47	71	81	79	78	67	107	79	88	111	64	84	47	85	144	97	103
4	39	52		85	61	58	100	47	60	86	112	83	82	77	71	77	146	134	86	83	102
5	35	70		92	74	65	58	81	78	79		161	70	89	109	78	133	75	125	75	64
6	47	37		58	73	79	84	66	114	69		77		146	117	60	145	46	99	85	67
7	65	65		87	83	62	92	42	100	62		144		95	123	80	56	91	99	58	105
8	42	43		71	110	83		88	92	55				83	88	137	114	60	129	46	65
9	54			93		75		108	72	92				96	94	191	110	79	80	42	79
10	56							83	85	83				80	127	123	85	72	74	67
11	68							108	99					81	116	110	69	101	91
12	66							99	128					73	58	91	129	98	58
13	52							77	82						95	146	58	93	60
14	64							86											47
15	54							86											57
16																			53

## Sheet: Figure 4F
Figure 4 source data
Figure 4F
	normalized Plin3-RFP on lipid droplets
Fish	0 h	0.75 h	1.25 h	1.5 h	2 h	2.5 h	3 h	3.5 h	4.5 h	5.5 h	6.5 h	7.5 h	8.5 h	16 h	18 h	20 h	22 h	24 h	26 h	28 h	30 h
1	0	1.39173	1.85428	1.55956	1.38354	1.14204	1.21163	1.31805	1.45722	1.15023	1.85428	1.67826	1.14613	0.810479	0.777732	0.654932	0.716332	0.753172	1.17069	0.794106	0.593533
2	0	1.30986	1.38764	1.35898	2.73434	2.61564	2.2063	2.7016	2.26361	1.27302	1.13795	1.51044	1.12157	0.732706	0.671306	0.732706	1.1666	0.740892	1.08473	0.773639	1.4122
3	0	1.2894	2.07532	1.63733	1.18297	1.08064	1.77241	1.5309	1.2894	1.76013	0.695866	1.13385	1.15432	0.871879	0.712239	0.708146	0.744986	0.552599	0.933279	0.933279	1.05608
4	0	0.769546	1.42038	1.09701	1.8379	1.79288	1.4081	1.33442	2.54196	1.26893	0.659026	0.667212	1.75604	0.736799	0.654932	1.32214	1.15841	0.372493	0.798199	0.577159	0.822759
5	0	1.52681	1.22391	1.19935	1.09292	1.32214	1.14204	2.00982	0.806386	1.73557	0.802292	0.810479	0.728612	0.646746	1.05608	0.552599	0.900532	0.908719	0.740892	0.433893	1.13385
6	0	1.13795	2.01392	1.1052	0.912812	2.0876	0.871879	0.822759	0.732706	1.01105	0.871879	0.802292	0.675399	1.25665	0.806386	0.904625	0.671306	1.19116	0.605813	0.912812	0.871879
7	0	1.33852	1.05608	2.15718	1.05608	1.1052	1.42857	0.986492	1.43266	0.654932	1.55546	0.683586	0.785919	0.847319	0.695866	0.806386	0.720426	0.744986	0.757266	0.806386	0.241506
8	0	1.87065	1.97708	0.798199	0.875972	1.08473	1.1052	1.00696	1.4695	0.642652	0.826852	0.859599	0.986492	0.466639	0.843226	0.777732	0.744986	0.683586	0.937372	0.806386	0.761359
9	0	1.24847	1.50634	1.62914	1.15023	0.794106	1.15432	0.925092	1.33033	0.659026	0.908719	0.671306	0.798199	0.671306	0.826852	0.679492	0.695866	0.884159	0.802292	0.699959	0.671306
10	0	1.26893	0.908719	0.974212	1.37945	1.37126	1.56365	1.00696	0.605813	0.880065		0.659026	0.794106	0.679492	0.744986	0.708146	0.896439	0.757266	0.564879	0.609906	0.757266
11	0	1.37126	1.09292	1.16251		0.920999	0.978305	0.753172	1.11339	0.855506				0.667212	0.704052	0.761359	0.929185	0.716332	0.22104	0.761359	0.933279
12						1.14613	0.908719							0.728612	0.503479	0.753172	0.777732	0.478919	0.671306	0.589439	0.736799
	normalized EGFP-Plin2 on lipid droplets
Fish	0 h	0.75 h	1.25 h	1.5 h	2 h	2.5 h	3 h	3.5 h	4.5 h	5.5 h	6.5 h	7.5 h	8.5 h	16 h	18 h	20 h	22 h	24 h	26 h	28 h	30 h
1	0	0.139735	0.170297	0.205941	0.194059	0.19802	0.233663	0.926733	0.693069	0.835644	1.54851	2.05941	1.01782	4.94653	3.75842	1.00594	0.431683	0.49505	0.205941	0.542574	0.546535
2	0	0.150764	0.186139	0.150495	0.237624	0.257426	0.162376	0.653465	0.415842	1.06535	0.80396	0.8	0.463366	2.47525	2.07921	2.48317	0.423762	0.974257	1.2198	0.356436	1.71485
3	0	0.158871	0.182178	0.178218	0.312871	0.174257	0.20198	0.265347	0.986139	0.776238	0.89505	2.05941	1.9802	1.06139	2.12673	2.67327	1.75842	2.00396	1.94455	1.11683	0.594059
4	0	0.144107	0.170297	0.205941	0.166337	0.213861	0.514851	0.30099	0.942574	0.530693	0.776238	1.55644	0.807921	2.7604	3.4495	1.15644	1.59208	1.62376	1.15644	0.736634	0.253465
5	0	0.153901		0.229703	0.166337	0.213861	0.186139	0.320792	0.265347	0.582178	1.27921	1.07327	0.308911	3.26733	1.79406	1.06139	1.58812	1.2396	0.768317	1.08119	0.946535
6	0	0.156907		0.20198	0.253465	0.29703	0.245545	0.320792	0.427723	1.01782	2.22574	1.97228	2.93069	3.10495	2.75644	1.63564	0.962376	0.982178	0.807921	0.49901	1.09307
7	0	0.159778		0.20198	0.237624	0.261386	0.170297	0.934653	0.772277	0.570297	0.30495	2.15842	1.3901	1.63168	2.0198	2.06337	0.772277	0.475248	0.190099	1.71881	1.83762
8	0	0.152804		0.217822	0.213861	0.233663	0.221782	0.281188	1.13267	0.213861	1.54851	0.990099	2.68119	2.67327	1.80198	1.69109	2.22574	1.47723	0.241584	1.21584	0.423762
9	0	0.156309		0.233663	0.19802		0.526733	0.578218	0.439604	1.15644	1.54059	0.427723	1.18416	1.98416	1.67921	2.02772	2.95842	0.875248	0.30495	1.19604	1.2
10	0	0.179022		0.174257	0.205941		0.364356		1.32673	1.41386		0.625743	1.77426	2.03564	1.52079	3.27525	2.24554	0.994059	0.392079	1.33861	0.166337
11		0.161592		0.190099			0.308911			0.368317		2.96634	1.8297	2.17822	0.669307	2.52277	0.613861	1.20396	0.764356		1.70297
12		0.158594								1.27129			0.736634	1.6198		2.52277	1.52079		0.59802		0.431683
13										0.819802			1.3505			3.97228	2.20594		0.776238		0.467327
14													1.51683						1.36634		1.02574
15													1.71089						0.780198		1.13663
16													1.07723								0.435644
17													1.80198								1.05347
18													1.77426
	normalized fabp2:EGFP-PLIN2 on lipid droplets
Fish	0 h	0.75 h	1.25 h	1.5 h	2 h	2.5 h	3 h	3.5 h	4.5 h	5.5 h	6.5 h	7.5 h	8.5 h	16 h	18 h	20 h	22 h	24 h	26 h	28 h	30 h
1	0	0.347437	0.316477	0.412797	0.574475	0.485036	0.687994	0.646715	1.31751	1.06295	0.712074	2.0227	2.53182	1.14895	1.91606	2.54214	1.63743	1.59959	1.37599	0.309598	1.35535
2	0	0.261438	0.227038	0.619195	0.454076	0.705194	0.798074	0.481596	0.743034	0.911593	1.04575	1.62023	3.95597	1.56863	1.87479	1.87822	1.86447	1.62023	1.60991	0.646715	0
3	0	0.302718	0.402477	0.395597	0.392157	0.605435	0.835913	0.687994	0.870313	1.04575	1.09047	1.07671	1.10423	2.2979	0.839353	1.68559	0.553836	0.994152	2.8311	2.07086	1.73719
4	0	0.337117		0.374957	0.512556	0.419677	0.560716	0.416237	0.584795	0.650155	1.17303	1.21431	1.30375	1.23495	1.15239	0.780874	2.4011	2.02614	1.62367	1.87135	1.80943
5	0	0.481596		0.684555	0.364637	0.402477	0.447196	0.801514	1.03543	0.780874		2.30134	1.20743	1.43447	2.34606	1.22119	2.48366	0.949432	0.994152	1.13863	0.646715
6	0	0.137599		0.471276	0.770554	0.529756	1.20399	0.712074	1.15583	0.746474		1.16271		3.19573	1.67527	0.657035	2.71758	0	1.56175	1.35191	0.873753
7	0	0.254558		0.491916	0.853113	0.405917	0.323357	0.161679	0.935673	0.687994		1.94358		1.99862	1.02511	1.16271	0.681115	1.60647	2.31166	0.385277	1.50327
8	0	0.147919		0.467836	0.684555	0.650155		0.939112	0.966632	0.467836				1.09735	1.91606	2.29102	1.33127	0.519436	2.29446	0.196078	1.04575
9	0			0.591675		0.756794		1.00791	0.626075	0.615755				1.27279	1.70623	2.48022	2.33918	0.773994	0.546956	0.309598	1.30031
10	0							0.904713	0.722394	0.890953				1.63055	1.14895	0.595115	1.16271	0.502236	0.337117	0.897833
11	0							0.811834	1.59959					1.49983	2.4527	1.06983	0.423117	1.55143	1.86791
12	0							1.10423	0.718954					0.904713	0.894393	0.808394	2.2635	1.25215	0.804954
13	0							0.749914	0.939112						1.46887	1.9539	0.416237	1.25903	0.526316
14	0							0.921913											0.182319
15	0							0.873753											0.657035
16																			0.337117
