# Supplementary material for: Imaging cytoplasmic lipid droplets in vivo with fluorescent perilipin 2 and perilipin 3 knock-in zebrafish
Source: eLife. 2021 Aug 13;10:e66393. doi: 10.7554/eLife.66393 (PMC8460263; doi:10.7554/eLife.66393)
Supplement: Figure 5—source data 1. [file elife-66393-fig5-data1.xlsx]

## Sheet: Sheet1
Figure 5 source data
standard length data associated with Figure 5D
	Fus(plin3-RFP)/+						Fus(EGFP-plin2)/+
		6 dpf unfed	9dpf unfed	15 dpf 4% chol diet	18 dpf 4% chol diet			6 dpf unfed	9dpf unfed	15 dpf 4% chol diet	18 dpf 4% chol diet
	Fish #	Standard Length (mm)					Fish #	Standard Length (mm)
	1	3.714	3.821	5.287	5.488		1	3.969	3.878	4.864	4.125
	2	3.807	3.748	5.103	5.719		2	3.71	3.885	5.336	4.724
	3	3.7	3.875	5.259	5.467		3	3.771	3.845	4.693	5.489
	4	3.53	3.703	4.985	5.512		4	3.865	3.884	5.449	5.572
	5	3.639	3.847	5.252	5.205		5	3.887	3.751	5.068	5.023
	6	3.664	3.722	6.284	5.348		6	3.779	3.919	5.636	5.557
	7	3.696	3.745	5.663	5.888		7	3.788	3.848	5.434	4.912
	8	3.842	3.841	5.439	5.438		8	3.898	3.847	5.339	5.162
	9	3.769	3.771	5.779	4.641		9	3.9	3.689	5.463	5.481
	10	3.591	3.721	5.754	5.395		10	3.848	3.987	5.627	5.572
	11	3.755	3.864	4.394	5.051		11	3.85	3.677	5.558	5.751
	12	3.763	3.763	5.429	4.69		12	3.85	3.736	5.287	5.266
	13	3.882	3.857	5.415	5.601		13	3.829	3.916	5.619	5.297
	14	3.668	3.813	4.754	5.203		14	3.82	3.91	5.512	5.494
	15	3.639	3.801	4.985	5.686		15	3.821	3.717	5.451	5.233
	16	3.638	3.934	4.89	5.31		16	3.791	3.73	5.613	4.817
	17	3.759		5.421	5.35		17	3.818	3.927	5.858	5.876
	18	3.831		5.418			18	3.845	3.878	5.335
	19	4		5.398			19	3.848	3.97	5.518
	20	3.993		5.231			20	3.852	3.816	5.468
	21	3.754		5.003			21	3.757		5.196
	22	3.809		3.705			22	3.912		5.717
	23	3.806		6.232			23	3.759		4.84
	24	3.826		5.684			24	3.706		5.321
	25	3.87		5.111			25	3.872		4.738
	26	3.895		5.592			26	3.8		5.124
	27	3.911		5.233			27	3.796		5.314
	28	3.8		5.442			28	3.873
	29	3.768		4.581			29	3.737
	30	3.863		5.161			30	3.814
	31	3.806					31	3.786
	32	3.847					32	3.886
	33	3.731					33	3.873
	34	3.969					34	3.923
	35	3.672					35	3.857
	36	3.687					36	3.971
	37	3.824					Mean	3.83503	3.8405	5.34733	5.25594
	38	3.998					SD	0.0636695	0.0934398	0.297913	0.434452
	39	3.64
	40	4.115
	41	3.892
	42	3.91
	43	3.858
	44	3.949
	45	3.672
	46	3.678
	47	3.662
	48	3.642
	49	3.67
	50	3.875
	51	3.672
	Mean	3.78335	3.80162	5.2628	5.35247
	SD	0.123388	0.0658573	0.506676	0.329968
