# Supplementary material for: Imaging cytoplasmic lipid droplets in vivo with fluorescent perilipin 2 and perilipin 3 knock-in zebrafish
Source: eLife. 2021 Aug 13;10:e66393. doi: 10.7554/eLife.66393 (PMC8460263; doi:10.7554/eLife.66393)
Supplement: Figure 6—figure supplement 1—source data 1. [file elife-66393-fig6-figsupp1-data1.xlsx]

## Sheet: Supp 6A
Figure 6 - figure supplement 1 source data
Supplement 6A
	Standard length (mm)
Fish #	WT	Fus(plin3-RFP)/+	Fus(EGFP-plin2)/+	Fus(EGFP-plin2)/+;Fus(plin3-RFP)/+
1	7.31975	6.45909	7.30898	6.99877
2	7.2802	6.71197	7.47811	6.47079
3	6.91351	7.02108	7.05395	7.19528
4	7.23227	6.54928	6.99289	7.00612
5	6.55411	6.97717	7.25194	7.03018
6	7.15604	6.91486	7.09082	7.24863
7	7.10404	7.28187	6.79407	6.38598
8	6.31818	7.35518	7.32384	7.10607
9	6.65923		6.66205	6.9015
10	6.60852		6.03609	6.2336
11	6.90778		7.12317	6.96754
12	6.75679		6.92464	6.52334
13			7.01689	5.87451
14				7.00407
15				6.70012
16				5.6498
17				6.29247
18				5.86807
Mean	6.90087	6.90881	7.00442	6.63649
SD	0.32476	0.322046	0.366315	0.495726

## Sheet: Supp 6B
Figure 6 - figure supplement 1 source data
Supplement 6B
	Standard Length (mm)
Fish #	WT	Fus(plin3-RFP)/+
1	6.1221	6.78076
2	6.08773	6.76621
3	6.76013	6.98529
4	6.57663	4.85212
5	6.29902	5.67621
6	7.00438	6.62444
7	7.12671	6.44471
8	6.4604	6.83655
9	6.4538	4.68322
10	6.49798	6.73155
11	7.01019	6.58923
12	6.61401	6.02865
13	6.41622	6.17267
14	5.75253	6.4188
15	7.08797	6.94313
16	7.23443	6.76661
17	7.68125	6.91865
18	6.98702	6.80676
19	7.3579	7.76839
20	6.86348	6.20974
21	6.6649	6.68204
22	7.16297	6.89123
23	7.48025
24	6.83425
25	7.33903
Mean	6.79501	6.48077
SD	0.473016	0.690661

## Sheet: Supp 6C
Figure 6 - figure supplement 1 source data
Supplement 6C
	Standard Length (mm)
Fish #	WT	Fus(EGFP-plin2)/+
1	6.95631	7.62618
2	7.45176	7.36486
3	6.81768	7.74568
4	6.98395	7.35825
5	7.42938	6.72234
6	7.88175	6.52381
7	7.25427	7.25029
8	6.69287	7.71668
9	7.08351	7.81102
10	7.15423	7.42848
11	6.98298	7.33048
12	7.04181	7.65566
13	6.53881	7.48921
14		7.25158
15		6.07695
16		7.08646
17		7.3728
18		6.76926
19		6.73803
20		6.70288
21		7.82526
22		6.2031
23		7.46743
24		7.41124
25		7.22151
26		7.25705
27		7.73457
Mean	7.09764	7.22745
SD	0.351412	0.478101
