# Supplementary material for: Imaging cytoplasmic lipid droplets in vivo with fluorescent perilipin 2 and perilipin 3 knock-in zebrafish
Source: eLife. 2021 Aug 13;10:e66393. doi: 10.7554/eLife.66393 (PMC8460263; doi:10.7554/eLife.66393)
Supplement: Figure 6—source data 1. [file elife-66393-fig6-data1.xlsx]

## Sheet: Figure 6B 6C
Figure 6 source data
Figure 6B, 6C
15dpf fish, fed Gemma 75 3x day, standard nursery rearing
Fish #	Standard Length (mm)
1	5.422
2	4.991
3	5.112
4	5.378
5	4.951
6	5.35
7	5.157
8	4.079
9	5.115
10	5.229
11	4.507
12	5.161
13	5.074
14	5.382
15	5.184
16	5.13
17	4.476
18	5.288
19	5.181
20	4.815
21	5.057
22	5.029
23	5.205
24	5.2
25	5.328
26	4.954
27	5.146
28	5.06
29	5.292
30	5.036
31	5.447
32	5.457
33	5.39
34	5.238
35	5.11
36	5.263
37	5.066
38	5.627
39	5.183
40	5.185
41	5.331
42	5.146
43	5.249
44	4.953
45	5.315
46	5.249
47	5.166
	5.14179	mean
	0.263869	S.D.
	47	# fish

## Sheet: Figure 6D
Figure 6 source data
Figure 6D
15 dpf fish, fed Gemma 75 + 4% cholesterol 3x day, standard nursery rearing
Fish #	Standard Length (mm)
1	4.323
2	5.269
3	5.361
4	5.48
5	4.981
6	5.415
7	5.624
8	4.839
9	5.314
10	4.531
11	5.191
12	4.956
13	5.783
14	5.605
	5.19086	mean
	0.421117	S.D.
	14	# fish
